# Supplementary material
Source: publisher figshare collection journal article supplement (https://tandf.figshare.com/ndownloader/files/33660550)
Supplement: Supplementary file 1 [file 33660550]

source("SemiparametricTest_revision_final.R")
library("spatstat")
load("dc.covars.Rda")
load("DCcrime.Rda")
DC.grids <- read.csv("DCgrids.csv",header=T)
grid.mark_block <- ppp(x=DC.grids$Easting, y=DC.grids$Northing,marks=DC.grids$census_block,window=win)
grid.mark_blockg <- ppp(x=DC.grids$Easting, y=DC.grids$Northing,marks=DC.grids$census_blockgroup,window=win)
grid.mark_ctract <- ppp(x=DC.grids$Easting, y=DC.grids$Northing,marks=DC.grids$census_tract,window=win)

rmax.pre <-600
r <- seq(0,rmax.pre,l=401)
###if the number of knots is too small, there maybe some numerical issues
pd.K <- 100
degree <- 3

model <- "Full"

for(model in c("Full","Reduced")){
set.seed(1)
if(model=="Full")
##Full model for Burglary
object <- kppm(Burglary~black.per+bachelor.per+poverty.per+Onpremisedist+Liquordist+Grocerydist+Bdist20+pop.den_blockg+I(black.per_block*populus_block)+I(house.per_block*populus_block)+area_block+I(area_block^2)+I(pop.den_blockg^2),covariates=dc.covars, clusters="Thomas")

if(model=="Reduced")
##Reduced model for Burglary
object <- kppm(Burglary~bachelor.per+Liquordist+Bdist20+pop.den_blockg+area_block+I(area_block^2)+I(pop.den_blockg^2),covariates=dc.covars, clusters="Thomas")

beta.pre <- object$po$coef
wfun <- function(dist){dist}
R_range <- c(10,pi/median(nndist(Burglary))*rmax.pre)

obj.cv <- NonPCF_pd_MCE_cv_parallel(object,beta.pre,r,degree,grid.num=NULL,rescale=TRUE,R_range,n.R=10,Iter=1,n.rcv=100,wfun,d.out=100,err=10^(-3),numCores=10)

par(mfrow=c(2,2))
plot(obj.cv$R_seq,obj.cv$cv.score,type="l",lwd=2)
plot(obj.cv$R_seq,obj.cv$lscv.score,type="l",lwd=2)

pd.R <- obj.cv$R_opt.ls
pd.K <- obj.cv$K_opt.ls

obj.pcf.ls <- NonPCF_pd_MCE(object,beta.pre,r,R=pd.R,degree,K=pd.K,grid.num=NULL,rescale=TRUE,Iter=1,wfun,d.out=100,err=10^(-3))

plot(r,obj.pcf.ls$gfun.pd(r),lwd=2,col="red",type="l")


object.ls <- improve.kppm_new(object,fast=TRUE,eps.rmax = 0.01,gfun=obj.pcf.ls$gfun.pd,cov=TRUE,rmax.pre=rmax.pre,covariate.center=TRUE)
betathat.ls <- object.ls$po$coef
se.ls <- sqrt(diag(object.ls$improve$vcov))
betathat.ls
se.ls
pvalue.ls <- 2*(1-pnorm(abs(betathat.ls)/se.ls))
pvalue.ls

mu <- object.ls$improve$mu/object.ls$improve$wt
U <- object.ls$improve$U

if(model=="Reduced"){
  mu_reduced <- as.im(data.frame("x"= U$x, "y" = U$y, "value" =log(mu)))
gfun_burg_red <- obj.pcf.ls$gfun.pd
}
##census block level pvlaues
r1.ls <- c(LocalKppm_Firstorder_parallel(object.ls,numCores=50,grid.mark=grid.mark_block))
##census block-group level pvlaues
r2.ls <- c(LocalKppm_Firstorder_parallel(object.ls,numCores=50,grid.mark=grid.mark_blockg))
##census tract level pvlaues
r3.ls <- c(LocalKppm_Firstorder_parallel(object.ls,numCores=50,grid.mark=grid.mark_ctract))
names(r1.ls) <-names(r2.ls) <-names(r3.ls) <- c("Semi-L", "Semi-G", "Semi-C")

if(model=="Reduced") save.image("Burglary_red.RData")
if(model=="Full") save.image("Burglary_full.RData")
}
